# Supplementary material for: A Small RNA, UdsC, Interacts with the RpoHII mRNA and Affects the Motility and Stress Resistance of Rhodobacter sphaeroides
Source: MDPI journal article supplement (doi:10.3390/ijms232415486), 2022-12-07
Supplement: s1 [file s1]

**Table S1.** Bacterial strains and plasmids used in this study

| Strain or plasmid                    | Description                                                                                         | Reference or source |
|--------------------------------------|-----------------------------------------------------------------------------------------------------|---------------------|
| <b><i>E. coli</i> strains</b>        |                                                                                                     |                     |
| JM109                                | Cloning strain                                                                                      | New England Biolabs |
| S17-1                                | Donor strain for diparental conjugation                                                             | [1]                 |
| <b><i>R. sphaeroides</i> strains</b> |                                                                                                     |                     |
| 2.4.1                                | wild type                                                                                           | [2]                 |
| 2.4.1 ΔUdsC                          | <i>R. sphaeroides</i> 2.4.1 with a scarless deletion of <i>UdsC</i> (3' UTR of RSP_7527)            | This study          |
| 2.4.1 Δ <i>rpoHII</i>                | <i>R. sphaeroides</i> 2.4.1 with a scarless deletion of <i>rpoHII</i>                               | [3]                 |
| 2.4.1 OE UdsC                        | <i>R. sphaeroides</i> 2.4.1 with the plasmid PCV2_udsC for an inducible overexpression of sRNA UdsC |                     |
| <b>Plasmids</b>                      |                                                                                                     |                     |
| pJET1.2/blunt cloning vector         | Ap <sup>r</sup> , 2.97 kb                                                                           | Fermentas           |
| pBBR1                                | Km <sup>r</sup> , broad-host-range cloning vector                                                   | [4]                 |
| pCV2                                 | Gen <sup>r</sup> , inducible overexpression plasmid                                                 | This study          |
| pCV2_udsC                            | Gen <sup>r</sup> , inducible overexpression of sRNA UdsC                                            | This study          |
| pPHU231:mVenus                       | Gen <sup>r</sup> , EVC                                                                              | [5]                 |
| pP-Prp <i>HIII</i> :mVenus           | Sp <sup>r</sup> , transcriptional fusion of <i>rpoHII</i> promoter sequence to mVenus               | This study          |
| pP- <i>PtorF</i> :mVenus             | Sp <sup>r</sup> , transcriptional fusion of <i>torF</i> promoter sequence to mVenus                 | This study          |

Ap<sup>r</sup>: Ampicillin, Km<sup>r</sup>: Kanamycin, Gen<sup>r</sup>: Gentamycin, Sp<sup>r</sup>: Spectinomycin

**Table S2.** Oligodeoxynucleotide sequences for cloning, northern blot and *in vitro* transcription

| Oligodeoxynucleotide     | Sequence 5'-3'                | Reference or source |
|--------------------------|-------------------------------|---------------------|
| <b>Cloning</b>           |                               |                     |
| 7527_sRNA_SacI_for       | CGAGAGCTCATAGTCGGCTGAGGCAGTCA | This study          |
| 7527_sRNA_mRNA_KpnI_rev  | CGAGGTACCAAGAAAAAGGGCTCCGACGC | This study          |
| 7527_sRNA_up_EcoRI_for   | CGAGAATTCGTTGCCGCAGGTCAGATGC  | This study          |
| 7527_sRNA_up_XbaI_rev    | CGATCTAGACCTCGTGCGCTCATGC     | This study          |
| 7527_sRNA_dn_XbaI_for    | CGATCTAGAGGGCTCCGCCGC         | This study          |
| 7527_sRNA_dn_HindIII_rev | CGAAAGCTTCCGGTGCCGTTCTTGACC   | This study          |

|                                |                                                 |            |
|--------------------------------|-------------------------------------------------|------------|
| Bseq_torF_long_HindI<br>II_for | ACTAAAGCTTCCTTATCGACAGGCGCGC                    | This study |
| Bseq_torF_nat_Xba_re<br>v      | ACTATCTAGAGATGATCTGGATGGCGGCC<br>A              | This study |
| rpoH2_Pro_HindIII_fo<br>r      | ACTAAAGCTTGCCCACCATCACGGTTGC                    | This study |
| rpoH2_XbaI_rev                 | ACTATCTAGAGGTATATCCGTCCAGTGCCA<br>T             | This study |
| <b>Northern Blot</b>           |                                                 |            |
| UdsC                           | CTGCGACAATGACTGCCTCAGCCGA                       | [6]        |
| 5S rRNA                        | CTTGAGACGCAGTACCATTG                            | [7]        |
| <b>EMSA</b>                    |                                                 |            |
| T7_RpoHII_for                  | TAATACGACTCACTATAGGGAGACCGGAC<br>ATGTGTTTTTCCG  | This study |
| RpoHII_rev                     | AGTGCCATCAGGACCCCTG                             | This study |
| T7_UdsC_for                    | TAATACGACTCACTATAGGGAGAGATAGTC<br>GGCTGAGGCAGTC | This study |
| UdsC_rev                       | CAAAGAAAAAGGGCTCC                               | This study |

**Table S3:** Log<sub>2</sub>fold changes (calculated by DEseq2 analysis) in read counts determined by RNAseq within a UdsC overexpression strain (OE UdsC) after 15 min of IPTG treatment in comparison to the UdsC overexpression without (0 min) IPTG treatment and the UdsC knockout strain ( $\Delta$ UdsC) in comparison to the wild type (WT). **The Table shows the top 50 downregulated genes for the UdsC overexpression strain with IPTG (15 min) versus without IPTG (0 min).**

| Locus    | Gene            | Function                                           | Log <sub>2</sub> FC<br>15 min IPTG<br>vs. 0 min IPTG | Log <sub>2</sub> FC<br>$\Delta$ UdsC vs.<br>WT |
|----------|-----------------|----------------------------------------------------|------------------------------------------------------|------------------------------------------------|
| RSP_0262 | <i>bchX</i>     | Chlorophyllide reductase, BchX subunit             | -2.77                                                | 0,63                                           |
| RSP_3706 | <i>RSP_3706</i> | Hypothetical protein                               | -2.78                                                | 0,43                                           |
| RSP_0286 | <i>bchB</i>     | light-independent protochlorophyllide reductase    | -2.78                                                | 0,73                                           |
| RSP_0104 | <i>nuoF1</i>    | Respiratory-chain NADH dehydrogenase,              | -2.79                                                | 0,54                                           |
| RSP_0102 | <i>nuoCD</i>    | NADH dehydrogenase (ubiquinone),                   | -2.79                                                | 0,72                                           |
| RSP_1816 | <i>RSP_1816</i> | Mg chelatase-related protein                       | -2.80                                                | 0,76                                           |
| RSP_7559 | <i>RSP_7559</i> | NA                                                 | -2.83                                                | -0,86                                          |
| RSP_2395 | <i>RSP_2395</i> | cytochrome c peroxidase                            | -2.84                                                | 1,32                                           |
| RSP_3269 | <i>gapB</i>     | glyceraldehyde-3-phosphate dehydrogenase           | -2.85                                                | -0,03                                          |
| RSP_1284 | <i>prkA</i>     | Phosphoribulokinase                                | -2.89                                                | -0,5                                           |
| RSP_4203 | <i>RSP_4203</i> | Putativ glutaredoxin family protein                | -2.92                                                | -0,59                                          |
| RSP_2337 | <i>RSP_2337</i> | Hypothetical protein                               | -2.92                                                | -0,34                                          |
| RSP_2087 | <i>RSP_2087</i> | Hypothetical protein                               | -2.93                                                | -0,83                                          |
| RSP_0260 | <i>bchZ</i>     | putative chlorophyllide reductase, BchZ subunit    | -2.94                                                | 0,47                                           |
| RSP_0317 | <i>hemN</i>     | coproporphyrinogen III oxidase                     | -2.96                                                | 0,26                                           |
| RSP_2888 | <i>RSP_2888</i> | Transcriptional regulator                          | -2.96                                                | 0,36                                           |
| RSP_7252 | <i>RSP_7252</i> | Hypothetical protein                               | -2.96                                                | 0,25                                           |
| RSP_1256 | <i>RSP_1256</i> | enoyl-(acyl carrier protein) reductase             | -3.02                                                | -0,82                                          |
| RSP_0278 | <i>RSP_0278</i> | putative light-harvesting complex assembly protein | -3.03                                                | 0,74                                           |
| RSP_0315 | <i>pucC</i>     | Light-harvesting 1 (B870) complex assembly         | -3,12                                                | 0,74                                           |
| RSP_1819 | <i>feoA1</i>    | Ferrous iron transport protein A                   | -3,12                                                | -0,68                                          |
| RSP_0285 | <i>bchN</i>     | Light-independent protochlorophyllide reductase    | -3,13                                                | 1,09                                           |

|          |                 |                                               |       |       |
|----------|-----------------|-----------------------------------------------|-------|-------|
| RSP_3266 | <i>fbpB</i>     | Fructose-1,6-bisphosphatase                   | -3,14 | -1,16 |
| RSP_0284 | <i>bchF</i>     | 2-vinyl bacteriochlorophyllide hydratase      | -3,15 | 0,03  |
| RSP_0261 | <i>bchY</i>     | Chlorophyllide reductase, BchY subunit        | -3,17 | 1,07  |
| RSP_0264 | <i>crtF</i>     | Hydroxyneurosporene methyltransferase         | -3,19 | 1,03  |
| RSP_1255 | <i>RSP_1255</i> | Phosphate acetyltransferase                   | -3,19 | -0,49 |
| RSP_0279 | <i>bchG</i>     | Bacteriochlorophyll a synthase                | -3,20 | 0,66  |
| RSP_0820 | <i>RSP_0820</i> | Putative cytochrome B561                      | -3,21 | 0,51  |
| RSP_0259 | <i>pufQ</i>     | Protein pufQ                                  | -3,24 | 0,29  |
| NA       | 3'UTR           | NA                                            | -3,27 | 0,4   |
| RSP_2758 | <i>RSP_2758</i> | Hypothetical protein                          | -3,37 | 0,46  |
| RSP_2338 | <i>RSP_2338</i> | Hypothetical protein                          | -3,39 | -0,18 |
| RSP_0465 | <i>RSP_0465</i> | Putative protease                             | -3,43 | 0,12  |
| RSP_3044 | <i>dorS</i>     | DMSO/TMAO-sensor hybrid histidine kinase      | -3,45 | 0,43  |
| RSP_1818 | <i>feoB</i>     | Fe <sup>2+</sup> transport system protein B   | -3,46 | 0,43  |
| RSP_0281 | <i>bchE</i>     | Mg-protoporphyrin IX monomethylester cyclase  | -3,47 | 0,07  |
| RSP_1817 | <i>RSP_1817</i> | Hypothetical protein                          | -3,48 | 0,85  |
| RSP_0101 | <i>nuoB1</i>    | NADH dehydrogenase (ubiquinone)               | -3,57 | 0,04  |
| RSP_2331 | <i>ppaZ</i>     | PpaZ, a novel pseudoazurin precursor          | -3,57 | -0,25 |
| RSP_2573 | <i>RSP_2573</i> | Hypothetical protein                          | -3,59 | 0,67  |
| RSP_0464 | <i>RSP_0464</i> | Putative protease                             | -3,62 | 0,23  |
| RSP_1283 | <i>cfxA</i>     | Fructose-bisphosphate aldolase I              | -3,65 | 0,16  |
| RSP_0265 | <i>crtE</i>     | Geranylgeranyl pyrophosphate synthetase       | -3,68 | 1,17  |
| RSP_1254 | <i>RSP_1254</i> | Putative acetate kinase (acetokinase)         | -3,71 | -0,55 |
| RSP_7547 | <i>RSP_7547</i> | Hypothetical protein                          | -3,82 | -0,02 |
| RSP_3788 | <i>RSP_3788</i> | Hypothetical protein                          | -3,83 | -0,32 |
| RSP_1285 | <i>cbbF1</i>    | Fructose-1,6-bisphosphatase I                 | -4,08 | -0,51 |
| RSP_2066 | <i>RSP_2066</i> | Hypothetical protein                          | -4,09 | 1,4   |
| RSP_3434 | <i>RSP_3434</i> | Hypothetical protein                          | -4,28 | 0,45  |
| RSP_0468 | <i>RSP_0468</i> | Putative 3-octaprenyl-4-hydroxybenzoate lyase | -4,47 | 0,37  |

**Table S4:** Log<sub>2</sub>fold changes (calculated by DEseq2 analysis) in read counts determined by RNAseq within a UdsC overexpression strain (OE UdsC) after 15 min of IPTG treatment in comparison to the UdsC overexpression without (0 min) IPTG treatment and the UdsC knockout strain ( $\Delta$ UdsC) in comparison to the wild type (WT). The Table shows the 22 and 51 genes from Figure 2D, which are colored in red.

| Locus    | Gene            | Function                                        | Log <sub>2</sub> FC<br>15 min IPTG<br>vs. 0 min IPTG | Log <sub>2</sub> FC<br>$\Delta$ UdsC vs.<br>WT |
|----------|-----------------|-------------------------------------------------|------------------------------------------------------|------------------------------------------------|
| RSP_0265 | <i>crtE</i>     | Geranylgeranyl pyrophosphate synthetase         | -3,68                                                | 1,17                                           |
| RSP_0264 | <i>crtF</i>     | Hydroxyneurosporene methyltransferase           | -3,19                                                | 1,03                                           |
| RSP_0261 | <i>bchY</i>     | Chlorophyllide reductase, BchY subunit          | -3,17                                                | 1,07                                           |
| RSP_0285 | <i>bchN</i>     | light-independent protochlorophyllide reductase | -3,13                                                | 1,09                                           |
| RSP_0315 | <i>pucC</i>     | Light-harvesting 1 (B870) complex assembly      | -3,12                                                | 1,11                                           |
| RSP_2395 | <i>RSP_2395</i> | BCCP, cytochrome c peroxidase                   | -2,84                                                | 1,32                                           |
| RSP_6125 | <i>RSP_6125</i> | hypothetical protein                            | -2,74                                                | 1,44                                           |
| RSP_6138 | <i>RSP_6138</i> | hypothetical protein                            | -2,68                                                | 1,67                                           |
| RSP_1406 | <i>RSP_1406</i> | hypothetical protein                            | -2,49                                                | 1,21                                           |
| RSP_3070 | <i>RSP_3070</i> | hypothetical protein                            | -1,89                                                | 1,05                                           |
| RSP_1480 | <i>oppB</i>     | ABC oligopeptide transporter                    | -1,87                                                | 1,74                                           |
| RSP_0254 | <i>dxsA</i>     | 1-deoxy-D-xylulose-5-phosphate synthase         | -1,74                                                | 1,09                                           |
| RSP_1574 | <i>RSP_1574</i> | Cytochrome b562                                 | -1,72                                                | 1,17                                           |

|          |                   |                                                   |       |       |
|----------|-------------------|---------------------------------------------------|-------|-------|
| RSP_2085 | RSP_2085          | hypothetical protein                              | -1,65 | 1,12  |
| RSP_6137 | RSP_6137          | transcriptional regulator, TetR family            | -1,59 | 1,27  |
| RSP_0293 | RSP_0293          | hypothetical protein                              | -1,25 | 1,19  |
| RSP_0294 | RSP_0294          | hypothetical protein                              | -1,23 | 1,17  |
| RSP_2864 | <i>cbbE</i>       | Pentose-5-phosphate-3-epimerase                   | -1,21 | 1,17  |
| RSP_1278 | <i>cbbZ</i>       | phosphoglycolate phosphatase                      | -1,15 | 1,11  |
| RSP_0095 | <i>smoS</i>       | sorbitol dehydrogenase                            | -1,05 | 1,44  |
| RSP_0576 | RSP_0576          | Na <sup>+</sup> /solute-symporter                 | -1,04 | 1,11  |
| RSP_0660 | RSP_0660          | hypothetical protein                              | -1,04 | 1,07  |
|          |                   |                                                   |       |       |
| RSP_1718 | <i>rplW</i>       | 50S ribosomal protein L23                         | 1,09  | -1,20 |
| RSP_1733 | <i>rpmD</i>       | Ribosomal protein L30                             | 1,13  | -1,39 |
| RSP_0047 | <i>cheB2</i>      | chemotaxis methyltransferase, CheB2               | 1,15  | -2,25 |
| RSP_0037 | <i>flgM</i>       | Putative FlgM, negative regulator of flagellin    | 1,29  | -3,16 |
| NA       | <i>sRNA_00061</i> | NA                                                | 1,41  | -2,73 |
| RSP_1049 | <i>pheAa</i>      | chorismate mutase                                 | 1,59  | -1,26 |
| RSP_3388 | RSP_3388          | putative Isocitrate/isopropylmalate dehydrogenase | 1,60  | -1,86 |
| RSP_0042 | <i>cheA3</i>      | Chemotaxis histidine protein kinase, CheA3        | 1,67  | -1,93 |
| RSP_0044 | <i>tlpT</i>       | putative cytoplasmic chemoreceptor, TlpT          | 1,85  | -2,87 |
| RSP_0043 | <i>cheY6</i>      | chemotaxis response regulator, CheY6              | 1,99  | -2,16 |
| RSP_3386 | RSP_3386          | TRAP-T family transporter                         | 2,12  | -1,01 |
| RSP_3389 | RSP_3389          | Isocitrate/isopropylmalate dehydrogenase          | 2,13  | -2,40 |
| RSP_0045 | <i>slp</i>        | chromosome partitioning protein                   | 2,26  | -2,31 |
| RSP_6169 | RSP_6169          | hypothetical protein                              | 2,48  | -1,69 |
| RSP_0046 | <i>cheW4</i>      | Chemotaxis protein, CheW4                         | 2,61  | -2,65 |
| RSP_3387 | RSP_3387          | TRAP-T family transporter                         | 2,74  | -1,81 |
| RSP_0084 | RSP_0084          | hypothetical protein                              | 2,86  | -1,67 |
| RSP_0032 | <i>fliA</i>       | sigma factor FliA (Sigma-28 group, flagellar)     | 2,88  | -1,82 |
| NA       | <i>UdsC</i>       | NA                                                | 2,91  | -3,46 |
| RSP_0079 | <i>flgF</i>       | flagellar proximal rod protein FlgF               | 2,95  | -2,29 |
| RSP_0051 | <i>torF</i>       | Torf protein                                      | 3,02  | -1,25 |
| RSP_0073 | <i>flgL</i>       | flagellar hook-associated protein 3 FlgL          | 3,08  | -2,19 |
| RSP_0059 | <i>fliL</i>       | flagellar biosynthesis protein, FliL              | 3,15  | -2,40 |
| RSP_0076 | <i>flgI</i>       | flagellar P-ring protein                          | 3,15  | -2,57 |
| RSP_0054 | <i>fliG</i>       | Probable flagellar motor switch protein FliG      | 3,25  | -1,39 |
| RSP_0065 | <i>fliR</i>       | Flagellar protein FliR                            | 3,29  | -1,65 |
| RSP_6086 | RSP_6086          | hypothetical protein                              | 3,33  | -2,04 |
| RSP_6092 | RSP_6092          | hypothetical protein                              | 3,34  | -2,29 |
| RSP_0081 | <i>flgD</i>       | Flagellar scaffolding protein FlgD                | 3,35  | -2,82 |
| RSP_0064 | <i>fliQ</i>       | Flagellar protein FliQ                            | 3,38  | -2,71 |
| RSP_0074 | <i>flgK1</i>      | FlgK flagellar hook-associated protein 1          | 3,40  | -2,44 |
| RSP_0033 | RSP_0033          | hypothetical protein                              | 3,40  | -2,59 |
| RSP_0080 | <i>flgE</i>       | flagellar hook protein FlgE                       | 3,41  | -2,98 |
| RSP_0077 | <i>flgH</i>       | Flagellar L-ring protein                          | 3,48  | -2,08 |
| RSP_0072 | RSP_0072          | possible invasion protein                         | 3,50  | -2,42 |
| RSP_0078 | <i>flgG</i>       | Flagellar distal rod protein                      | 3,51  | -2,74 |
| RSP_0231 | <i>motB</i>       | flagellar MotB protein                            | 3,51  | -2,70 |
| RSP_6093 | <i>flgJ</i>       | FlgJ                                              | 3,53  | -1,83 |
| RSP_0060 | <i>fliM</i>       | Flagellar switch protein FliM                     | 3,54  | -2,20 |
| RSP_0066 | <i>flhB</i>       | Flagellar protein FlhB                            | 3,60  | -2,32 |
| RSP_0062 | <i>fliO</i>       | Flagellar protein FliO                            | 3,74  | -2,64 |
| RSP_0058 | <i>fliK</i>       | FliK, flagellar hook-length control protein       | 3,77  | -2,01 |

|          |                 |                                                    |      |       |
|----------|-----------------|----------------------------------------------------|------|-------|
| RSP_0233 | <i>motA</i>     | Flagellar motor protein MotA                       | 3,77 | -1,40 |
| RSP_0082 | <i>flgC</i>     | flagellar basal-body rod protein FlgC              | 3,83 | -2,77 |
| RSP_0035 | <i>RSP_0035</i> | hypothetical protein                               | 3,87 | -2,56 |
| RSP_0067 | <i>RSP_0067</i> | hypothetical protein                               | 3,89 | -2,80 |
| RSP_0061 | <i>fliN</i>     | Flagellar motor switch FliN protein                | 3,97 | -2,08 |
| RSP_0063 | <i>fliP</i>     | Flagellar transport protein FliP                   | 4,00 | -2,08 |
| RSP_0036 | <i>flgA</i>     | flagellar basal-body P-ring formation protein FlgA | 4,02 | -2,49 |
| RSP_0034 | <i>flhA</i>     | flagellar biosynthesis protein, FlhA               | 4,05 | -2,48 |
| RSP_0083 | <i>flgB</i>     | Flagellar proximal rod protein FlgB                | 4,65 | -2,19 |

**Table S5:** Log<sub>2</sub>fold changes (calculated by DEseq2 analysis) in read counts determined by RNAseq within a UdsC overexpression strain (OE UdsC) after 15 min of IPTG treatment in comparison to the UdsC overexpression without (0 min) IPTG treatment and the UdsC knockout (ΔUdsC) in comparison to the wild type (WT). The Table shows 27 genes of the motility gene cluster that are not or slightly regulated.

| Locus    | Gene            | Function                                                           | Log <sub>2</sub> FC<br>15 min IPTG<br>vs. 0 min IPTG | Log <sub>2</sub> FC<br>ΔUdsC vs.<br>WT |
|----------|-----------------|--------------------------------------------------------------------|------------------------------------------------------|----------------------------------------|
| RSP_1303 | <i>flgE1</i>    | putative flagellar hook protein                                    | -0,13                                                | -0,34                                  |
| RSP_1304 | <i>RSP_1304</i> | flagellar hook-associated protein                                  | -1,33                                                | -0,31                                  |
| RSP_1305 | <i>RSP_1305</i> | putative flagellar hook-associated protein                         | -0,28                                                | -1,04                                  |
| RSP_1307 | <i>flgI1</i>    | flagellar P-ring protein precursor                                 | -0,35                                                | -0,94                                  |
| RSP_1306 | <i>RSP_1306</i> | PAS sensor Signal Transduction Histidine Kinase                    | 0,76                                                 | 0,03                                   |
| RSP_1308 | <i>RSP_1308</i> | hypothetical protein                                               | -0,71                                                | 0,18                                   |
| RSP_1309 | <i>fliP1</i>    | Type III secretion system inner membrane P protein                 | 0,03                                                 | -0,91                                  |
| RSP_1310 | <i>RSP_1310</i> | hypothetical protein                                               | 0,59                                                 | 1,07                                   |
| RSP_1311 | <i>fliH1</i>    | putative flagellar biosynthesis/type III secretory pathway protein | -0,97                                                | 1,80                                   |
| RSP_1312 | <i>fliF</i>     | putative flagellar M-ring protein                                  | 0,24                                                 | -0,39                                  |
| RSP_1313 | <i>RSP_1313</i> | possible flagellar synthesis protein                               | -0,67                                                | -0,44                                  |
| RSP_1314 | <i>RSP_1314</i> | hypothetical protein                                               | -0,85                                                | -0,08                                  |
| RSP_1315 | <i>RSP_1315</i> | hypothetical protein                                               | -1,31                                                | 0,60                                   |
| RSP_1316 | <i>motA1</i>    | flagellar motor protein                                            | 0,69                                                 | -0,25                                  |
| RSP_1318 | <i>RSP_1318</i> | hypothetical protein                                               | 0,04                                                 | -0,18                                  |
| RSP_1319 | <i>RSP_1319</i> | possible invasion protein                                          | 0,06                                                 | -0,19                                  |
| RSP_1320 | <i>flhA1</i>    | Flagellar biosynthesis pathway, component FlhA                     | -0,02                                                | -0,80                                  |
| RSP_1321 | <i>fliR1</i>    | Flagellar biosynthesis pathway, component FliR                     | -0,35                                                | -1,46                                  |
| RSP_1322 | <i>fliB</i>     | flagellar biosynthesis pathway, component FliB                     | -0,17                                                | -0,21                                  |
| RSP_6155 | <i>RSP_6155</i> | hypothetical protein                                               | 0,36                                                 | 0,53                                   |
| RSP_1323 | <i>RSP_1323</i> | hypothetical protein                                               | 0,23                                                 | 0,84                                   |
| RSP_1324 | <i>flgH1</i>    | flagellar L-ring protein precursor                                 | 0,32                                                 | 0,48                                   |
| RSP_1325 | <i>RSP_1325</i> | putative flagellar basal-body P-ring formation protein FlgA        | -0,40                                                | 0,30                                   |
| RSP_1326 | <i>RSP_1326</i> | putative flagellar basal body rod protein                          | -0,41                                                | 0,22                                   |
| RSP_1327 | <i>RSP_1327</i> | putative flagellar basal body rod protein                          | 0,07                                                 | 0,04                                   |
| RSP_1328 | <i>RSP_1328</i> | flagellar biosynthetic protein FliQ                                | 0,16                                                 | 0,25                                   |
| RSP_1329 | <i>fliE1</i>    | putative flagellar hook-basal body complex protein                 | -0,81                                                | -1,31                                  |

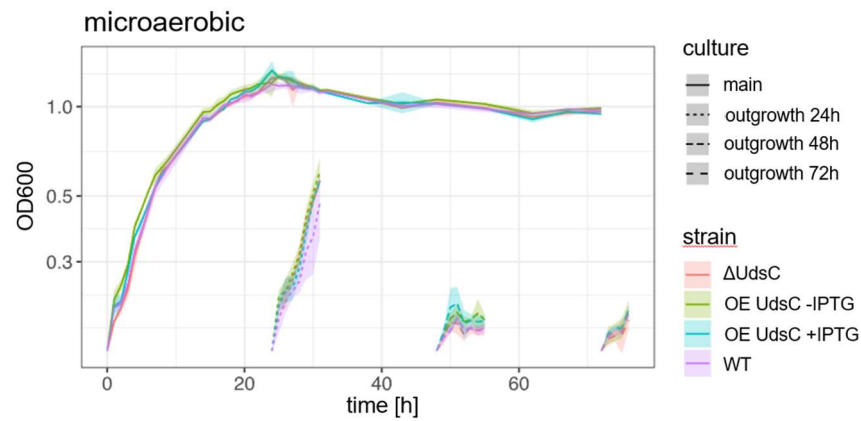

**Figure S1:** Growth curves of WT, UdsC knockout strain ( $\Delta$ UdsC) and the UdsC overexpression strain (OE UdsC strain (with or without IPTG added) under microaerobic conditions. The cultures were incubated for 72 h. 24, 48 and 72 h after inoculation, part of the cultures was diluted into fresh medium and outgrowth was monitored, while the remaining culture was further incubated for monitoring the OD. The lines represent the mean of biological triplicates and the standard deviations are indicated (shade).

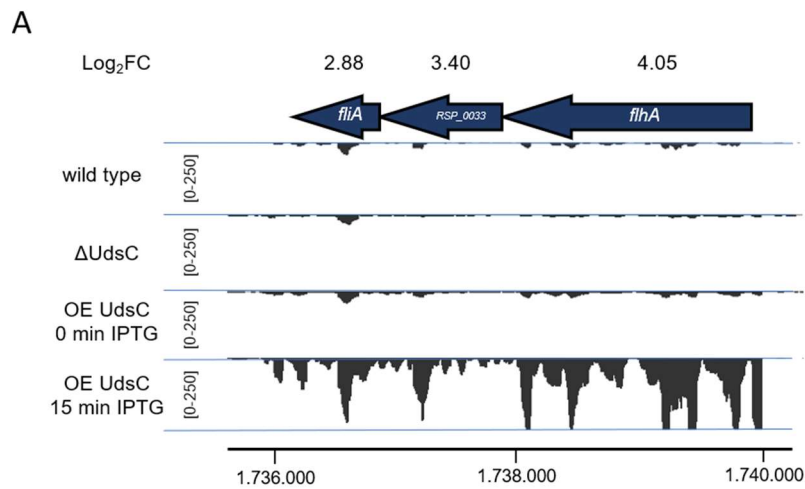

**B**

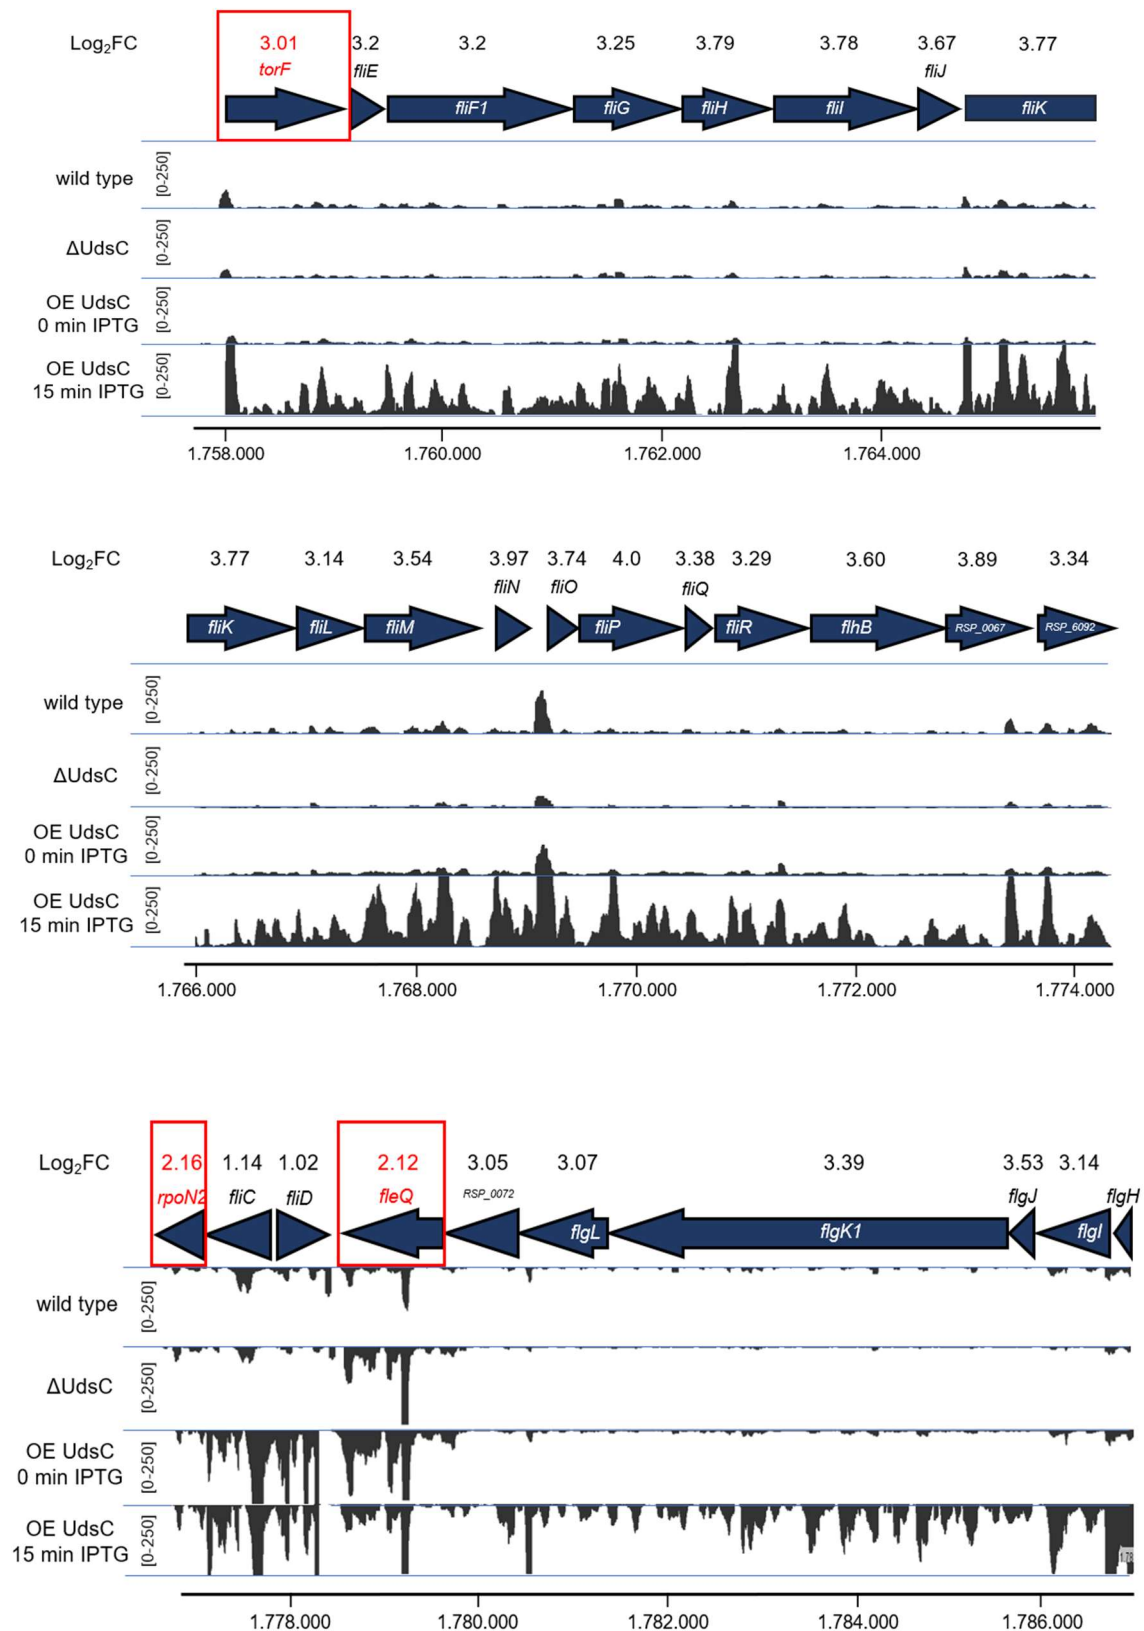



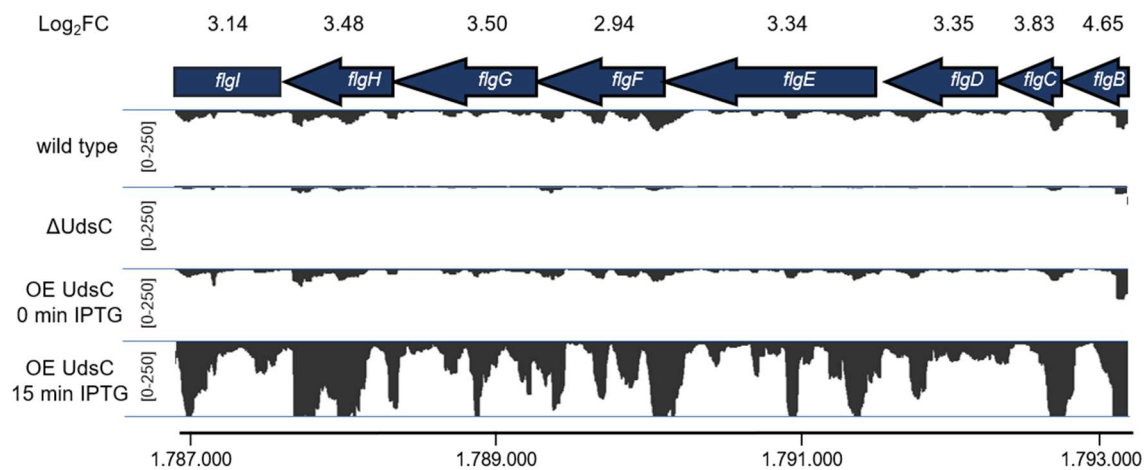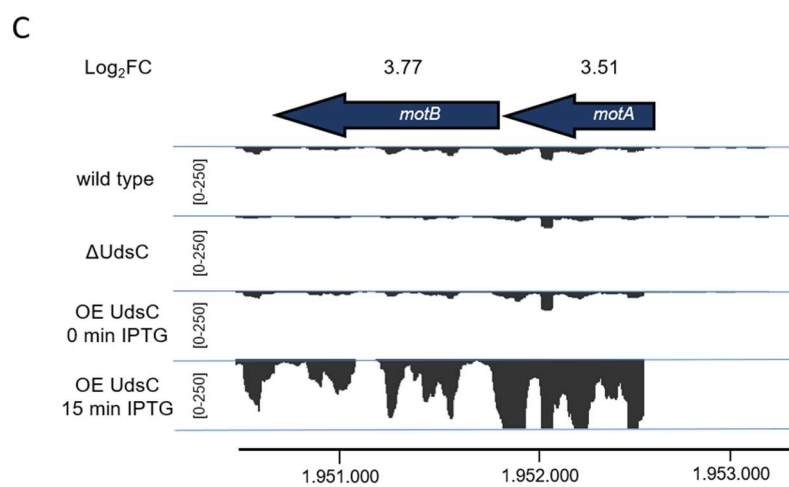

D

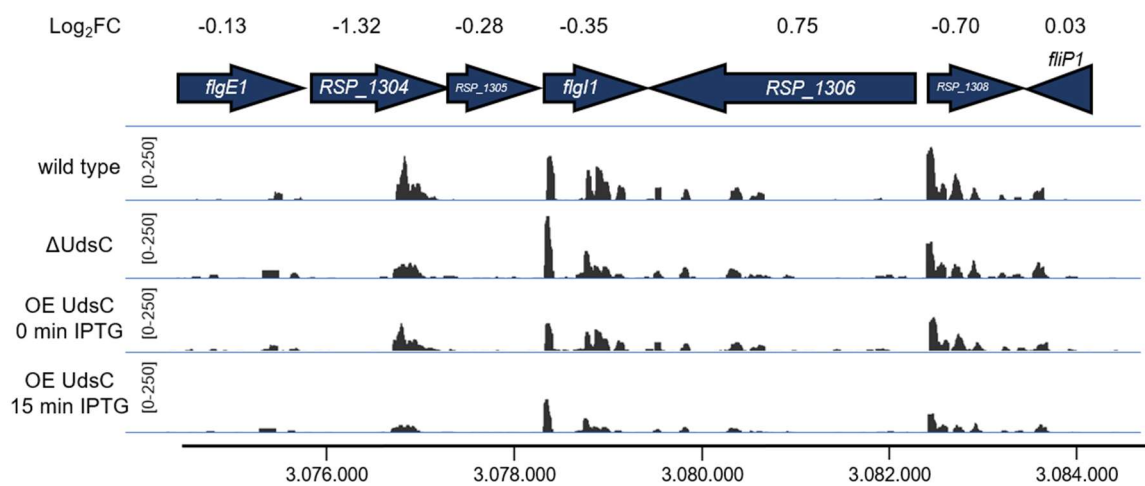



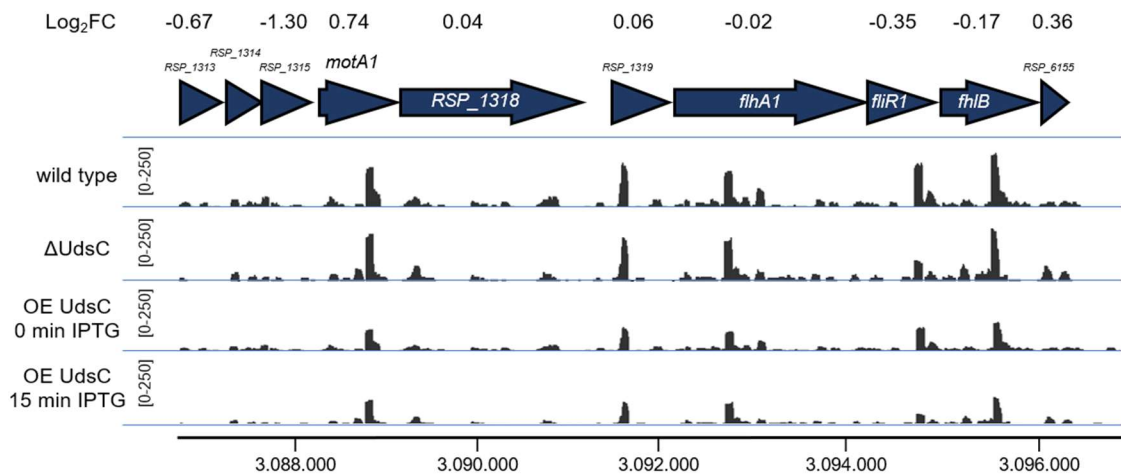

**Figure S2:** Effect of UdsC on expression of the motility genes from RNAseq visualized by the Integrated Genome Browser. Wild type, UdsC deletion strain ( $\Delta$ UdsC) and UdsC overexpression (OE UdsC) with and without IPTG (0 min IPTG or 15 min IPTG) were cultivated under microaerobic conditions and total RNA was isolated for RNA sequencing as described in materials and methods. The Log<sub>2</sub>fold change (Log<sub>2</sub>FC) of UdsC overexpression strain (OE UdsC) with IPTG (15 min) versus without IPTG (0 min) is indicated. Genes for important regulators of the flagella genes are marked in red.

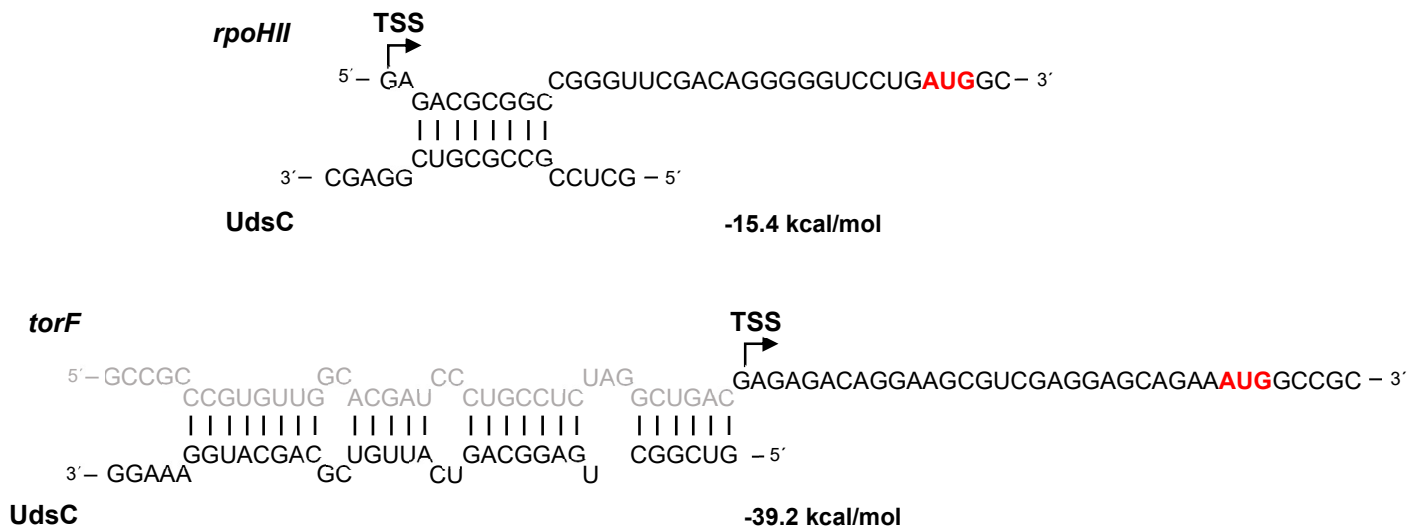

**Figure S3:** (A) Predicted base pairing between UdsC and *rpoHII* mRNA transcript by IntaRNA webtool [8]. The transcription start site (TSS) is indicated by an arrow and the start codon AUG is shown in red. (B) The predicted binding site for *torF* locates directly upstream of the transcriptional start site (TSS), which would exclude a binding of UdsC to *torF* mRNA.

- [1] Simon, R., O'Connell, M., Labes, M., and Puhler, A. (1986) Plasmid vectors for the genetic analysis and manipulation of rhizobia and other gram-negative bacteria, *Methods in enzymology* **118**, 640-659.
- [2] Van Niel, C.B. (1944) General Physiology, Morphology, and Classification of the Non-Sulfur Purple and Brown Bacteria, *Bacteriological Reviews*, **8**, 1-118

- [3] Nuss, A.M., Glaeser, J., and Klug, G. (2009) RpoH(II) activates oxidative-stress defense systems and is controlled by RpoE in the singlet oxygen-dependent response in *Rhodobacter sphaeroides*. *J. Bacteriol.*, **191**, 220-230.
- [4] Kovach, M.E.; Elzer, P.H.; Hill, D.S.; Robertson, G.T.; Farris, M.A.; Roop, R.M.; Peterson, K.M. Four new derivatives of the broad-host-range cloning vector pBBR1MCS, carrying different antibiotic-resistance cassettes. *Gene* **1995**, *166*, 175–176, doi:10.1016/0378-1119(95)00584-1.
- [5] Grützner, J., Remes, B., Eisenhardt, K. M. H., Scheller, D., Kretz, J., Madhugiri, R., et al. (2021). sRNA-mediated RNA processing regulates bacterial cell division. *Nucleic Acids Res* *49*, 7035–7052. doi: 10.1093/nar/gkab491
- [6] Spanka, D.-T., and Klug, G. (2021). Maturation of UTR-Derived sRNAs Is Modulated during Adaptation to Different Growth Conditions. *Int J Mol Sci* *22*. doi: 10.3390/ijms222212260
- [7] Berghoff, B.A., Glaeser, J., Sharma, C.M, Zobawa, M., Lottspeich, F., Vogel, J., and Klug, G. (2011) Contribution of Hfq to photooxidative stress resistance and global regulation in *Rhodobacter sphaeroides*. *Mol. Microbiol.*, **80**, 1479-1495.
- [8] Mann, M.; Wright, P.R.; Backofen, R. IntaRNA 2.0: enhanced and customizable prediction of RNA-RNA interactions. *Nucleic Acids Res.* **2017**, *45*, W435-W439, doi:10.1093/nar/gkx279.
